# Supplementary material
Source: publisher figshare collection journal article supplement (https://acs.figshare.com/ndownloader/files/20182781)
Supplement: Supplementary file 1 [file 20182781]

# Enhancement of the Power Conversion Efficiency of Organic Solar Cells by Surface Patterning of Azobenzene Thin Films

Genevieve Tadeson<sup>a</sup>, and Ribal Georges Sabat<sup>a\*</sup>

<sup>a</sup> Department of Physics and Space Science, Royal Military College of Canada, PO Box 17000, Station Forces  
Kingston, Ontario CANADA, K7K 7B4

## **Supporting materials**

### **Impact of the UV Lamp Distance on the Nanostructures of the Azobenzene Thin Films**

Under a constant exposure time, the distance of the azobenzene thin films to the UV lamp was found to have a critical impact on the size of the azobenzene nanostructures and the transmission of the film. Figure S1 shows the impact of the sample distance to the UV lamp on the grating depth,  $R_q$  and  $R_{qmax}$ .

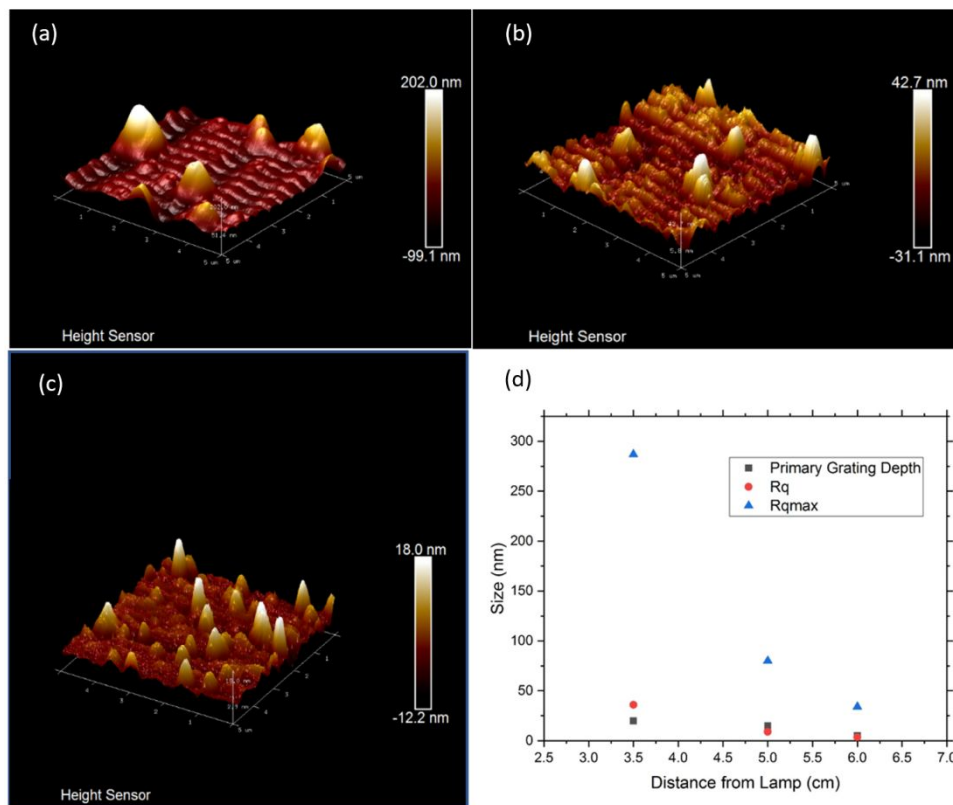

Figure S1. Effects of sample distance from the UV lamp on the size of the nanostructures. All three samples had identical original gratings and were exposed to UV light for 20 hours, with the distance to the lamp being (a) 3.5 cm, (b) 5 cm and (c) 6 cm. In part (d), the primary grating depth,  $R_q$  and  $R_{qmax}$  are plotted as a function of the distance from the lamp for samples imaged in parts (a), (b) and (c).
